# Supplementary material
Source: Springer Nature journal article supplement (https://www.springermedizin.de/resource/supplementary/12889_2009_3035_MOESM1_ESM.pdf/9487894)

Golembiewski et al.

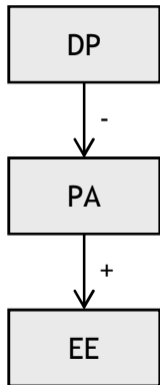

Leiter & Maslach

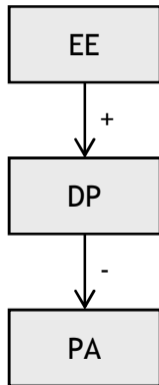

Lee & Ashforth

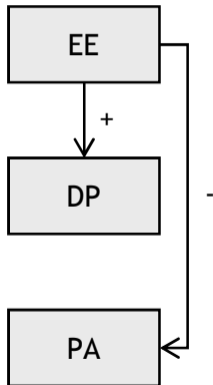

Supplement: MOESM1 [file 9487894]
